# Supplementary material for: Taxonomic and Metabolite Diversities of Moss-Associated Actinobacteria from Thailand
Source: MDPI journal article supplement (doi:10.3390/metabo12010022), 2021-12-27
Supplement: s1 [file s1]

| Condition     | Isolate | No. | Retention time | Compound                                                  | Peak area % | Molecular weight | Formula                                         | Reported activity          | References |
|---------------|---------|-----|----------------|-----------------------------------------------------------|-------------|------------------|-------------------------------------------------|----------------------------|------------|
| Underivatized | S32-76  | 1   | 7.302          | Decane                                                    | 0.09        | 142              | C <sub>10</sub> H <sub>22</sub>                 | Antimicrobial              | [31]       |
|               |         | 2   | 9.649          | Phenylethyl Alcohol                                       | 0.2         | 122              | C <sub>8</sub> H <sub>10</sub> O                | Antimicrobial              | [32]       |
|               |         | 3   | 15.412         | 1,1'-(1,3-phenylene)bis-ethanone                          | 0.1         | 162              | C <sub>10</sub> H <sub>10</sub> O <sub>2</sub>  | No reported antimicrobial  | This study |
|               |         | 4   | 16.45          | Tetraglyme                                                | 0.07        | 222              | C <sub>10</sub> H <sub>22</sub> O <sub>5</sub>  | No reported antimicrobial  | This study |
|               |         | 5   | 17.28          | 5-Methyl-tetradecane                                      | 0.1         | 212              | C <sub>15</sub> H <sub>32</sub>                 | No reported antimicrobial  | This study |
|               |         | 6   | 17.573         | 3-Methyl-pentadecane                                      | 0.08        | 226              | C <sub>16</sub> H <sub>34</sub>                 | No reported antimicrobial  | This study |
|               |         | 7   | 17.837         | 3,6-Diisopropyl-2,5-dioxomorpholine                       | 0.22        | 199              | C <sub>10</sub> H <sub>17</sub> NO <sub>3</sub> | Antioxidant and anticancer | [33]       |
|               |         | 8   | 18.008         | Hexadecane                                                | 0.35        | 226              | C <sub>16</sub> H <sub>34</sub>                 | Antibacterial              | [34]       |
|               |         | 9   | 18.095         | Cyclotetradecane                                          | 0.15        | 196              | C <sub>14</sub> H <sub>28</sub>                 | Antimicrobial              | [35]       |
|               |         | 10  | 20.408         | 3-Methyl-heptadecane                                      | 0.18        | 254              | C <sub>18</sub> H <sub>38</sub>                 | Antimicrobial              | [36]       |
|               |         | 11  | 20.625         | Palustrol                                                 | 0.23        | 222              | C <sub>15</sub> H <sub>26</sub> O               | Antifungal, Antioxidant    | [37]       |
|               |         | 12  | 21.434         | Octyl-.beta.-D-glucopyranoside                            | 0.1         | 292              | C <sub>14</sub> H <sub>28</sub> O <sub>6</sub>  | Antimicrobial              | [38]       |
|               |         | 13  | 22.171         | 7,9-Di-tert-butyl-1-oxaspiro(4,5)deca-6,9-diene-2,8-dione | 0.37        | 276              | C <sub>17</sub> H <sub>24</sub> O <sub>3</sub>  | No reported antimicrobial  | This study |
|               |         | 14  | 22.975         | 2-Methyl-eicosane                                         | 0.56        | 296              | C <sub>21</sub> H <sub>44</sub>                 | Antibacterial              | [39]       |
|               |         | 15  | 23.241         | 1-Propyltridecyl 4-cyanobenzoate                          | 0.25        | 371              | C <sub>24</sub> H <sub>37</sub> NO <sub>2</sub> | Antimicrobial              | This study |
|               |         | 16  | 23.527         | Octylcyclodecane                                          | 0.3         | 252              | C <sub>18</sub> H <sub>36</sub>                 | No reported antimicrobial  | This study |
|               |         | 17  | 23.707         | Humulenol-II                                              | 0.15        | 220              | C <sub>15</sub> H <sub>24</sub> O               | Antibacterial, Antifungal  | [40]       |
|               |         | 18  | 24.625         | Indole-3-glyoxylic acid methyl ester                      | 0.13        | 203              | C <sub>11</sub> H <sub>9</sub> NO <sub>3</sub>  | No reported antimicrobial  | This study |
|               |         | 19  | 24.931         | 9-Methylheneicosane                                       | 0.19        | 310              | C <sub>22</sub> H <sub>46</sub>                 | No reported antimicrobial  | This study |
|               |         | 20  | 24.982         | Pentacosane                                               | 0.19        | 352              | C <sub>25</sub> H <sub>52</sub>                 | Antioxidant, Antimicrobial | [41-42]    |
|               |         | 21  | 25.062         | 5-Methyl-heneicosane                                      | 0.75        | 310              | C <sub>22</sub> H <sub>46</sub>                 | No reported antimicrobial  | This study |
|               |         | 22  | 25.318         | 3-Methyl-heneicosane                                      | 0.35        | 310              | C <sub>22</sub> H <sub>46</sub>                 | No reported antimicrobial  | This study |

|        |    |        |                                              |       |     |                                                               |                                |            |
|--------|----|--------|----------------------------------------------|-------|-----|---------------------------------------------------------------|--------------------------------|------------|
|        | 23 | 25.875 | 4-Cyclohexyl-decane                          | 0.34  | 224 | C <sub>16</sub> H <sub>32</sub>                               | Antimicrobial                  | [36]       |
|        | 24 | 27.094 | Dihydroergotamine                            | 0.83  | 583 | C <sub>33</sub> H <sub>37</sub> N <sub>5</sub> O <sub>5</sub> | Antibacterial                  | [43]       |
|        | 25 | 27.14  | Sulfurous acid, 2-ethylhexyl octadecyl ester | 0.26  | 446 | C <sub>26</sub> H <sub>54</sub> O <sub>3</sub> S              | No reported antimicrobial      | This study |
|        | 26 | 27.845 | Pinostrobin                                  | 0.45  | 270 | C <sub>16</sub> H <sub>14</sub> O <sub>4</sub>                | Antimicrobial                  | [44]       |
|        | 27 | 28.029 | Octadecylcyclohexane                         | 0.62  | 336 | C <sub>24</sub> H <sub>48</sub>                               | Antimicrobial                  | [45]       |
|        | 28 | 29.41  | 1,3-Propanediol, ethyl tetracosyl ether      | 0.08  | 440 | C <sub>29</sub> H <sub>60</sub> O <sub>2</sub>                | No reported antimicrobial      | This study |
|        | 29 | 30.694 | Tetracontane-1,40-diol                       | 0.63  | 594 | C <sub>40</sub> H <sub>82</sub> O <sub>2</sub>                | Antibacterial                  | [46]       |
|        | 30 | 30.856 | (Z)-14-Methyl-hexadec-8-enal                 | 0.22  | 252 | C <sub>17</sub> H <sub>32</sub> O                             | Antimicrobial                  | [47]       |
|        | 31 | 31.032 | 10,11-Dihydrofarnesol                        | 0.83  | 224 | C <sub>15</sub> H <sub>28</sub> O                             | No reported antimicrobial      | This study |
|        | 32 | 31.372 | 3-Methyl-octadecane                          | 0.19  | 268 | C <sub>19</sub> H <sub>40</sub>                               | No reported antimicrobial      | This study |
|        | 33 | 31.999 | Octacosanol                                  | 0.13  | 410 | C <sub>28</sub> H <sub>58</sub> O                             | Anti-Oxidant and Anti-Bacteria | [48]       |
|        | 34 | 32.838 | Tetrapentacontane                            | 0.33  | 758 | C <sub>54</sub> H <sub>110</sub>                              | Antioxidant and Antimicrobial  | [49-50]    |
|        | 35 | 33.845 | 1-Iodo-octacosane                            | 0.11  | 520 | C <sub>28</sub> H <sub>57</sub> I                             | No reported antimicrobial      | This study |
|        | 36 | 50.991 | Tris(2,4-di-tert-butylphenyl) phosphate      | 14.31 | 662 | C <sub>24</sub> H <sub>63</sub> O <sub>4</sub> P              | Anti-inflammatory              | [51]       |
| S32-77 | 1  | 3.364  | Octane                                       | 0.11  | 114 | C <sub>8</sub> H <sub>18</sub>                                | No reported antimicrobial      | This study |
|        | 2  | 7.301  | Decane                                       | 0.28  | 142 | C <sub>10</sub> H <sub>22</sub>                               | Antimicrobial                  | [31]       |
|        | 3  | 11.812 | 3-Methyl-N-isobutylbutyramide                | 0.11  | 157 | C <sub>9</sub> H <sub>19</sub> NO                             | No reported antimicrobial      | This study |
|        | 4  | 16.368 | β,2,3-trimethyl-cyclopentaneethanol          | 0.11  | 156 | C <sub>10</sub> H <sub>20</sub> O                             | No reported antimicrobial      | This study |
|        | 5  | 17.165 | 3-Methyl-piperazine-2,5-dione                | 0.27  | 128 | C <sub>5</sub> H <sub>8</sub> N <sub>2</sub> O <sub>2</sub>   | No reported antimicrobial      | This study |
|        | 6  | 18.009 | Hexadecane                                   | 0.5   | 226 | C <sub>16</sub> H <sub>34</sub>                               | Antibacterial                  | This study |
|        | 7  | 19.763 | DL-Alanyl-l-leucine                          | 0.12  | 202 | C <sub>9</sub> H <sub>18</sub> N <sub>2</sub> O <sub>3</sub>  | No reported antimicrobial      | [33]       |
|        | 8  | 27.087 | Dihydroergotamine                            | 0.95  | 583 | C <sub>33</sub> H <sub>37</sub> N <sub>5</sub> O <sub>5</sub> | Antibacterial compound         | This study |

|        |    |        |                                                      |       |     |                                                  |                                    |            |
|--------|----|--------|------------------------------------------------------|-------|-----|--------------------------------------------------|------------------------------------|------------|
| S32-79 | 9  | 27.469 | 1-Iodo-docosane                                      | 0.25  | 436 | C <sub>22</sub> H <sub>45</sub> I                | No reported antimicrobial          | [43]       |
|        | 10 | 27.699 | Octacosanol                                          | 0.25  | 410 | C <sub>28</sub> H <sub>58</sub> O                | Anti-Oxidant and Anti-bacterial    | This study |
|        | 11 | 27.842 | Pinostrobin                                          | 0.38  | 270 | C <sub>16</sub> H <sub>14</sub> O <sub>4</sub>   | Antimicrobial                      | [48]       |
|        | 12 | 27.966 | 1-Octadecanol, methyl ether                          | 0.21  | 284 | C <sub>19</sub> H <sub>40</sub> O                | Antifungal                         | [44]       |
|        | 13 | 28.028 | Octadecylcyclohexane                                 | 0.6   | 336 | C <sub>24</sub> H <sub>48</sub>                  | Antimicrobial                      | [52]       |
|        | 14 | 29.144 | 7-Methyl-hexadecane                                  | 0.39  | 240 | C <sub>17</sub> H <sub>36</sub>                  | No reported antimicrobial          | [45]       |
|        | 15 | 30.746 | 10,11-Dihydrofarnesol                                | 0.54  | 224 | C <sub>15</sub> H <sub>28</sub> O                | No reported antimicrobial          | This study |
|        | 16 | 31.033 | Crotonic acid, menthyl ester                         | 3.17  | 224 | C <sub>14</sub> H <sub>24</sub> O <sub>2</sub>   | Anticandidal and anti-carcinogenic | This study |
|        | 17 | 31.373 | 3-Methyl-octadecane                                  | 0.3   | 268 | C <sub>19</sub> H <sub>40</sub>                  | No reported antimicrobial          | [53]       |
|        | 18 | 31.815 | 2,6,10,14,18-Pentamethyl-2,6,10,14,18-eicosapentaene | 0.14  | 342 | C <sub>25</sub> H <sub>42</sub>                  | No reported antimicrobial          | This study |
|        | 19 | 32.064 | 4-cyclohexyl-Decane                                  | 0.88  | 224 | C <sub>16</sub> H <sub>32</sub>                  | Antimicrobial                      | This study |
|        | 20 | 33.117 | 2-Dodecen-1-yl(-)succinic anhydride                  | 0.22  | 266 | C <sub>16</sub> H <sub>26</sub> O <sub>3</sub>   | Antimicrobial, Antioxidant         | [36]       |
|        | 21 | 33.494 | 5-Methyl-heneicosane                                 | 0.39  | 310 | C <sub>22</sub> H <sub>46</sub>                  | No reported antimicrobial          | [54]       |
|        | 22 | 33.841 | 1-Iodo-octacosane                                    | 0.15  | 520 | C <sub>28</sub> H <sub>57</sub> I                | No reported antimicrobial          | This study |
|        | 23 | 50.947 | Tris(2,4-di-tert-butylphenyl) phosphate              | 18.13 | 662 | C <sub>42</sub> H <sub>63</sub> O <sub>4</sub> P | Anti-inflammatory                  | This study |
|        | 1  | 9.547  | Maltol                                               | 0.24  | 126 | C <sub>6</sub> H <sub>6</sub> O <sub>3</sub>     | Antibacterial, Antioxidant         | [51]       |
|        | 2  | 9.65   | Phenylethyl alcohol                                  | 0.52  | 122 | C <sub>8</sub> H <sub>10</sub> O                 | Antimicrobial                      | [55]       |
|        | 3  | 9.962  | Succinimide                                          | 0.53  | 99  | C <sub>4</sub> H <sub>5</sub> NO <sub>2</sub>    | No reported antimicrobial          | [32]       |
|        | 4  | 14.712 | N-Hydroxymethyl-2-phenylacetamide                    | 0.26  | 165 | C <sub>9</sub> H <sub>11</sub> NO <sub>2</sub>   | No reported antimicrobial          | This study |
|        | 5  | 15.413 | 1,1'-(1,3-Phenylene)bis-ethanone                     | 0.11  | 162 | C <sub>10</sub> H <sub>10</sub> O <sub>2</sub>   | No reported antimicrobial          | This study |
|        | 6  | 17.842 | 3,6-Diisopropyl-2,5-dioxomorpholine                  | 0.42  | 199 | C <sub>10</sub> H <sub>17</sub> NO <sub>3</sub>  | Antioxidant                        | This study |
|        | 7  | 18.01  | Hexadecane                                           | 0.45  | 226 | C <sub>16</sub> H <sub>34</sub>                  | Antibacterial                      | [33]       |

|             |        |    |        |                                                    |       |     |                                                                 |                                       |            |
|-------------|--------|----|--------|----------------------------------------------------|-------|-----|-----------------------------------------------------------------|---------------------------------------|------------|
|             |        | 8  | 19.798 | 3,4-diamino-6-methyl-1H-Pyrol[3,4-c]pyridin-1-one  | 2.63  | 176 | C <sub>8</sub> H <sub>8</sub> N <sub>4</sub> O                  | No reported antimicrobial             | [34]       |
|             |        | 9  | 20.24  | Tryptophol                                         | 0.23  | 161 | C <sub>10</sub> H <sub>11</sub> NO                              | Antibiotic                            | This study |
|             |        | 10 | 22.141 | 2-Amino-6-methyl-pyrido[2,3-d]pyrimidine-4(3H)-one | 0.93  | 176 | C <sub>8</sub> H <sub>8</sub> N <sub>4</sub> O                  | No reported antimicrobial             | [56]       |
|             |        | 11 | 24.317 | n-Heptadecanol-1                                   | 0.47  | 256 | C <sub>17</sub> H <sub>36</sub> O                               | Antimalarial, Antifungal, Antioxidant | This study |
|             |        | 12 | 27.232 | 2,4-Dimethyl-docosane                              | 0.33  | 338 | C <sub>24</sub> H <sub>50</sub>                                 | Antimicrobial                         | [57]       |
|             |        | 13 | 27.472 | 3-Methyl-octadecane                                | 0.12  | 268 | C <sub>19</sub> H <sub>40</sub>                                 | No reported antimicrobial             | [58]       |
|             |        | 14 | 27.758 | Pentacosane                                        | 4.2   | 352 | C <sub>25</sub> H <sub>52</sub>                                 | Antioxidant, Antimicrobial            | This study |
|             |        | 15 | 28.032 | 4-Cyclohexyl-undecane                              | 0.29  | 238 | C <sub>17</sub> H <sub>34</sub>                                 | No reported antimicrobial             | [41-42]    |
|             |        | 16 | 30.692 | 1,54-Dibromo-tetrapentacontane                     | 0.18  | 914 | C <sub>54</sub> H <sub>108</sub> Br <sub>2</sub>                | No reported antimicrobial             | This study |
|             |        | 17 | 32.067 | 4-Cyclohexyl-dodecane                              | 0.37  | 252 | C <sub>18</sub> H <sub>36</sub>                                 | Antimicrobial, antifungal             | This study |
|             |        | 18 | 50.979 | Tris(2,4-di-tert-butylphenyl) phosphate            | 10.59 | 662 | C <sub>42</sub> H <sub>63</sub> O <sub>4</sub> P                | Anti-inflammatory                     | [36]       |
| Derivatized | S32-76 | 1  | 11.81  | Phenylethyl Alcohol, TMS derivative                | 0.06  | 194 | C <sub>11</sub> H <sub>18</sub> OSi                             | Antimicrobial                         | [51]       |
|             |        | 2  | 12.077 | Urea, 2TMS derivative                              | 0.19  | 204 | C <sub>7</sub> H <sub>20</sub> N <sub>2</sub> OSi <sub>2</sub>  | Bacteriostatic and bactericidal       | [32]       |
|             |        | 3  | 14.002 | Pyrrole-2-carboxylic acid, 2TMS derivative         | 1.92  | 255 | C <sub>11</sub> H <sub>21</sub> NO <sub>2</sub> Si <sub>2</sub> | No reported antimicrobial             | [59]       |
|             |        | 4  | 14.255 | p-Toluic acid, TMS derivative                      | 0.06  | 208 | C <sub>11</sub> H <sub>16</sub> O <sub>2</sub> Si               | No reported antimicrobial             | This study |
|             |        | 5  | 15.252 | 1-Phenyl-1,2-ethanediol, 2TMS derivative           | 0.32  | 282 | C <sub>14</sub> H <sub>26</sub> O <sub>2</sub> Si <sub>2</sub>  | No reported antimicrobial             | This study |
|             |        | 6  | 15.627 | N-(trimethylsilyl)-Melamine                        | 0.07  | 198 | C <sub>6</sub> H <sub>14</sub> N <sub>6</sub> Si                | No reported antimicrobial             | This study |
|             |        | 7  | 15.946 | p-Benzoquinone                                     | 0.06  | 220 | C <sub>14</sub> H <sub>20</sub> O <sub>2</sub>                  | No reported antimicrobial             | This study |
|             |        | 8  | 16.409 | Erythritol, 4TMS derivative                        | 0.08  | 410 | C <sub>16</sub> H <sub>42</sub> O <sub>4</sub> Si <sub>4</sub>  | Antimicrobial                         | This study |
|             |        | 9  | 16.493 | 4-Hydroxybenzyl alcohol, 2TMS derivative           | 0.34  | 268 | C <sub>13</sub> H <sub>24</sub> O <sub>2</sub> Si <sub>2</sub>  | Antioxidant                           | [60-61]    |
|             |        | 10 | 18.017 | Hexadecane                                         | 0.39  | 226 | C <sub>16</sub> H <sub>34</sub>                                 | Antimicrobial                         | [62]       |
|             |        | 11 | 18.135 | Anthranilic acid, 2TMS derivative                  | 0.36  | 281 | C <sub>13</sub> H <sub>23</sub> NO <sub>2</sub> Si <sub>2</sub> | No reported antimicrobial             | [63,35]    |

|      |    |        |                                                                      |      |     |                                                                  |                                           |            |
|------|----|--------|----------------------------------------------------------------------|------|-----|------------------------------------------------------------------|-------------------------------------------|------------|
|      | 12 | 19.691 | Xylitol, 5TMS derivative                                             | 0.2  | 512 | C <sub>20</sub> H <sub>52</sub> O <sub>5</sub> Si <sub>5</sub>   | Antimicrobial                             | This study |
|      | 13 | 19.892 | 2,3-Dihydroxybenzoic acid, 3TMS derivative                           | 0.07 | 370 | C <sub>16</sub> H <sub>30</sub> O <sub>4</sub> Si <sub>3</sub>   | Catecholate siderophore,<br>Antimicrobial | [64-65]    |
|      | 14 | 20.134 | 5-Methyl-tetradecane                                                 | 0.05 | 212 | C <sub>15</sub> H <sub>32</sub>                                  | No reported antimicrobial                 | [18,66-67] |
|      | 15 | 20.921 | Myristic acid, TMS derivative                                        | 0.52 | 300 | C <sub>17</sub> H <sub>36</sub> O <sub>2</sub> Si                | Antimicrobial, antifungal                 | This study |
|      | 16 | 21.222 | Tryptophol, TMS derivative                                           | 0.14 | 233 | C <sub>13</sub> H <sub>19</sub> NOSi                             | Antibiotics                               | [68-69]    |
|      | 17 | 21.818 | (1E)-d-Glucose-2,3,4,5,6-pentakis-O-(trimethylsilyl)-o-methyloxyme   | 0.5  | 569 | C <sub>22</sub> H <sub>55</sub> NO <sub>6</sub> Si <sub>5</sub>  | No reported antimicrobial                 | [56]       |
|      | 18 | 21.959 | Galactose oxime, 6TMS derivative                                     | 2.07 | 627 | C <sub>24</sub> H <sub>61</sub> NO <sub>6</sub> Si <sub>6</sub>  | Anti-inflammatory                         | This study |
|      | 19 | 22.35  | Glucose, 5TMS derivative                                             | 0.44 | 540 | C <sub>21</sub> H <sub>52</sub> O <sub>6</sub> Si <sub>5</sub>   | No reported antimicrobial                 | [70]       |
|      | 20 | 24.277 | (10Z)-Heptadecenoic acid, TMS derivative                             | 0.23 | 340 | C <sub>20</sub> H <sub>40</sub> O <sub>2</sub> Si                | No reported antimicrobial                 | This study |
|      | 21 | 25.883 | Octadecyl-cyclohexane                                                | 0.21 | 336 | C <sub>24</sub> H <sub>48</sub>                                  | No reported antimicrobial                 | This study |
|      | 22 | 27.236 | 5-Methyl-heneicosane                                                 | 0.19 | 310 | C <sub>22</sub> H <sub>46</sub>                                  | No reported antimicrobial                 | This study |
|      | 23 | 28.866 | tert.-butyldimethylsilyl ether-5-Hydroxy-7-methoxyflavanone          | 0.14 | 384 | C <sub>22</sub> H <sub>28</sub> O <sub>4</sub> Si                | No reported antimicrobial                 | This study |
|      | 24 | 29.077 | 11-Methylpentacosane                                                 | 0.21 | 366 | C <sub>26</sub> H <sub>54</sub>                                  | No reported antimicrobial                 | This study |
|      | 25 | 30.698 | Hexadecyl-oxirane                                                    | 0.19 | 268 | C <sub>18</sub> H <sub>36</sub> O                                | Antimicrobial                             | This study |
|      | 26 | 30.897 | β-Gentiobiose, octakis(trimethylsilyl) ether, methyloxime (isomer 1) | 0.36 | 947 | C <sub>37</sub> H <sub>89</sub> NO <sub>11</sub> Si <sub>8</sub> | No reported antimicrobial                 | [71]       |
|      | 27 | 31.037 | (E)-Hexadec-2-enal                                                   | 0.22 | 238 | C <sub>16</sub> H <sub>30</sub> O                                | No reported antimicrobial                 | This study |
|      | 28 | 31.672 | Tetracontane                                                         | 0.8  | 562 | C <sub>40</sub> H <sub>82</sub>                                  | Antimicrobial , antioxidant               | This study |
|      | 29 | 33.496 | 5-Methylnonacosane                                                   | 0.12 | 422 | C <sub>30</sub> H <sub>62</sub>                                  | No reported antimicrobial                 | [49]       |
| S32- | 1  | 13.98  | Pyrrole-2-carboxylic acid, 2TMS derivative                           | 0.14 | 255 | C <sub>11</sub> H <sub>21</sub> NO <sub>2</sub> Si <sub>2</sub>  | Antifungal                                | This study |
| 77   | 2  | 14.08  | Acetin, bis-1,2-trimethylsilyl ether                                 | 0.33 | 278 | C <sub>11</sub> H <sub>26</sub> O <sub>4</sub> Si <sub>2</sub>   | No reported antimicrobial                 | [72]       |

|    |        |                                                                     |      |     |                                                                              |                                    |            |
|----|--------|---------------------------------------------------------------------|------|-----|------------------------------------------------------------------------------|------------------------------------|------------|
| 3  | 15.251 | 1-Phenyl-1,2-ethanediol, 2TMS derivative                            | 0.08 | 282 | C <sub>14</sub> H <sub>26</sub> O <sub>2</sub> Si <sub>2</sub>               | No reported antimicrobial          | This study |
| 4  | 15.631 | N-(trimethylsilyl)-Melamine                                         | 0.08 | 198 | C <sub>6</sub> H <sub>14</sub> N <sub>6</sub> Si                             | No reported antimicrobial          | This study |
| 5  | 15.949 | p-Benzoquinone                                                      | 0.23 | 220 | C <sub>14</sub> H <sub>20</sub> O <sub>2</sub>                               | No reported antimicrobial          | This study |
| 6  | 16.079 | 2,5-Bis[(trimethylsilyl)oxy]-4H-imidazol-4-one                      | 0.08 | 258 | C <sub>9</sub> H <sub>18</sub> N <sub>2</sub> O <sub>3</sub> Si <sub>2</sub> | No reported antimicrobial          | This study |
| 7  | 16.41  | Erythritol, 4TMS derivative                                         | 0.17 | 410 | C <sub>16</sub> H <sub>42</sub> O <sub>4</sub> Si <sub>4</sub>               | Antimicrobial                      | This study |
| 8  | 16.492 | 4-Hydroxybenzyl alcohol, 2TMS derivative                            | 0.14 | 268 | C <sub>13</sub> H <sub>24</sub> O <sub>2</sub> Si <sub>2</sub>               | Antioxidant                        | [60-61]    |
| 9  | 16.846 | Benzenebutanoic acid, TMS derivative                                | 0.1  | 236 | C <sub>13</sub> H <sub>20</sub> O <sub>2</sub> Si                            | Antimicrobial                      | [62]       |
| 10 | 18.017 | Hexadecane                                                          | 0.36 | 226 | C <sub>16</sub> H <sub>34</sub>                                              | Antimicrobial                      | [73]       |
| 11 | 20.254 | 1,2,3,5-Tetrakis-O-(trimethylsilyl)-β-D-arabinofuranose             | 0.12 | 438 | C <sub>17</sub> H <sub>42</sub> O <sub>5</sub> Si <sub>4</sub>               | Antimicrobial, Anti-inflammatory   | [63,35]    |
| 12 | 20.918 | Myristic acid, TMS derivative                                       | 0.41 | 300 | C <sub>17</sub> H <sub>36</sub> O <sub>2</sub> Si                            | Antimicrobial, Antifungal          | [74]       |
| 13 | 21.949 | pentakis(trimethylsilyl) ether-D-Allose, , methyloxime (syn)        | 0.75 | 569 | C <sub>22</sub> H <sub>55</sub> NO <sub>6</sub> Si <sub>5</sub>              | No reported antimicrobial          | [68-69]    |
| 14 | 22.19  | Pentadecanoic acid, TMS derivative                                  | 0.91 | 314 | C <sub>18</sub> H <sub>38</sub> O <sub>2</sub> Si                            | Antimicrobial                      | This study |
| 15 | 27.705 | Bacteriochlorophyll-c-stearyl                                       | 0.07 | 840 | C <sub>52</sub> H <sub>72</sub> MgN <sub>4</sub> O <sub>4</sub>              | No reported antimicrobial          | [69]       |
| 16 | 28.684 | (Z)-Docos-9-enenitrile                                              | 0.15 | 319 | C <sub>22</sub> H <sub>41</sub> N                                            | No reported antimicrobial          | This study |
| 17 | 29.235 | 5-Methyl-heneicosane                                                | 0.27 | 310 | C <sub>22</sub> H <sub>46</sub>                                              | No reported antimicrobial          | This study |
| 18 | 29.537 | 1-Monopalmitin, 2TMS derivative                                     | 0.08 | 474 | C <sub>25</sub> H <sub>54</sub> O <sub>4</sub> Si <sub>2</sub>               | No reported antimicrobial          | This study |
| 19 | 30.753 | 3,3'-Bi-p-menthane                                                  | 0.1  | 278 | C <sub>20</sub> H <sub>38</sub>                                              | No reported antimicrobial          | This study |
| 20 | 30.897 | octakis(trimethylsilyl) ether-β-Gentiobiose, methyloxime (isomer 1) | 0.3  | 947 | C <sub>37</sub> H <sub>89</sub> NO <sub>11</sub> Si <sub>8</sub>             | No reported antimicrobial          | This study |
| 21 | 31.038 | Crotonic acid, menthyl ester                                        | 0.47 | 224 | C <sub>14</sub> H <sub>24</sub> O <sub>2</sub>                               | Anticandidal and anti-carcinogenic | This study |
| 22 | 32     | 1-Methoxyoctacosane                                                 | 0.07 | 424 | C <sub>29</sub> H <sub>60</sub> O                                            | No reported antimicrobial          | [53]       |

|      |    |        |                                                         |      |     |                                                                               |                            |            |
|------|----|--------|---------------------------------------------------------|------|-----|-------------------------------------------------------------------------------|----------------------------|------------|
|      | 23 | 33.633 | L-Tryptophan, 1-(trimethylsilyl)-, trimethylsilyl ester | 0.08 | 348 | C <sub>17</sub> H <sub>28</sub> N <sub>2</sub> O <sub>2</sub> Si <sub>2</sub> | No reported antimicrobial  | This study |
|      | 1  | 9.005  | Pyruvic acid, TMS derivative                            | 0.07 | 160 | C <sub>6</sub> H <sub>12</sub> O <sub>3</sub> Si                              | Antimicrobial              | This study |
|      | 2  | 9.37   | tert-Butylpentamethyldisiloxane                         | 0.09 | 204 | C <sub>9</sub> H <sub>24</sub> OSi <sub>2</sub>                               | No reported antimicrobial  | [75]       |
|      | 3  | 9.451  | N-(Trimethylsilyl)hexanamide                            | 0.1  | 187 | C <sub>9</sub> H <sub>21</sub> NOSi                                           | No reported antimicrobial  | This study |
|      | 4  | 9.605  | Hydroxylamine, 3TMS derivative                          | 0.04 | 249 | C <sub>9</sub> H <sub>27</sub> NOSi <sub>3</sub>                              | No reported antimicrobial  | This study |
|      | 5  | 10.197 | 1-(Trimethylsilyl)-2-piperidinone                       | 0.2  | 171 | C <sub>8</sub> H <sub>17</sub> NOSi                                           | No reported antimicrobial  | This study |
|      | 6  | 11.042 | (3R)-Pantolactone, TMS derivative                       | 0.13 | 202 | C <sub>9</sub> H <sub>18</sub> O <sub>3</sub> Si                              | No reported antimicrobial  | This study |
|      | 7  | 11.373 | 2-Methylundecane                                        | 0.04 | 170 | C <sub>12</sub> H <sub>26</sub>                                               | No reported antimicrobial  | This study |
|      | 8  | 11.62  | Hymexazole, tert-butyldimethylsilyl ether               | 1.21 | 213 | C <sub>10</sub> H <sub>19</sub> NO <sub>2</sub> Si                            | No reported antimicrobial  | This study |
|      | 9  | 11.816 | Phenylethyl Alcohol, TMS derivative                     | 0.39 | 194 | C <sub>11</sub> H <sub>18</sub> OSi                                           | Antimicrobial              | This study |
|      | 10 | 12.876 | Maltol, TMS derivative                                  | 0.34 | 198 | C <sub>9</sub> H <sub>14</sub> O <sub>3</sub> Si                              | Antibacterial, Antioxidant | [32]       |
| S32- | 11 | 13.98  | Pyrrole-2-carboxylic acid, 2TMS derivative              | 0.29 | 255 | C <sub>11</sub> H <sub>21</sub> NO <sub>2</sub> Si <sub>2</sub>               | No reported antimicrobial  | [55]       |
| 79   | 12 | 14.185 | 1,2,4-Butanetriol, 3TMS derivative                      | 0.06 | 322 | C <sub>13</sub> H <sub>34</sub> O <sub>3</sub> Si <sub>3</sub>                | No reported antimicrobial  | This study |
|      | 13 | 14.252 | p-Toluic acid, TMS derivative                           | 0.05 | 208 | C <sub>11</sub> H <sub>16</sub> O <sub>2</sub> Si                             | No reported antimicrobial  | This study |
|      | 14 | 15.155 | α-Gurjunene                                             | 0.17 | 204 | C <sub>15</sub> H <sub>24</sub>                                               | No reported antimicrobial  | This study |
|      | 15 | 15.77  | Benzeneacetamide, TMS derivative                        | 0.41 | 207 | C <sub>11</sub> H <sub>17</sub> NOSi                                          | Antimicrobial              | This study |
|      | 16 | 15.948 | p-Benzoquinone                                          | 0.04 | 220 | C <sub>14</sub> H <sub>20</sub> O <sub>2</sub>                                | No reported antimicrobial  | [76,77]    |
|      | 17 | 16.111 | 5-Hydroxymaltol, 2-O-TMS                                | 0.21 | 286 | C <sub>12</sub> H <sub>22</sub> O <sub>4</sub> Si <sub>2</sub>                | Antioxidant                | This study |
|      | 18 | 16.365 | 4-(Methoxycarbonyl)phenol, TMS derivative               | 0.04 | 224 | C <sub>11</sub> H <sub>16</sub> O <sub>3</sub> Si                             | No reported antimicrobial  | [78]       |
|      | 19 | 16.41  | Erythritol, 4TMS derivative                             | 0.03 | 410 | C <sub>16</sub> H <sub>42</sub> O <sub>4</sub> Si <sub>4</sub>                | Antimicrobial              | This study |
|      | 20 | 16.491 | 4-Hydroxybenzyl alcohol, 2TMS derivative                | 0.21 | 268 | C <sub>13</sub> H <sub>24</sub> O <sub>2</sub> Si <sub>2</sub>                | Antioxidant                | [60-61]    |
|      | 21 | 16.582 | N-(2-Phenylethyl)-acetamide                             | 0.08 | 163 | C <sub>10</sub> H <sub>13</sub> NO                                            | No reported antimicrobial  | [62]       |
|      | 22 | 18.136 | Anthranilic acid, 2TMS derivative                       | 0.55 | 281 | C <sub>13</sub> H <sub>23</sub> NO <sub>2</sub> Si <sub>2</sub>               | No reported antimicrobial  | This study |

|    |        |                                                                    |      |     |                                                                 |                                  |            |
|----|--------|--------------------------------------------------------------------|------|-----|-----------------------------------------------------------------|----------------------------------|------------|
| 23 | 19.691 | Ribitol, 5TMS derivative                                           | 0.06 | 512 | C <sub>20</sub> H <sub>52</sub> O <sub>5</sub> Si <sub>5</sub>  | No reported antimicrobial        | This study |
| 24 | 20.509 | 3,5-Di-tert-butyl-2-trimethylsilyloxybenzaldehyde                  | 0.4  | 306 | C <sub>18</sub> H <sub>30</sub> O <sub>2</sub> Si               | No reported antimicrobial        | This study |
| 25 | 20.927 | Myristic acid, TMS derivative                                      | 0.2  | 300 | C <sub>17</sub> H <sub>36</sub> O <sub>2</sub> Si               | Antimicrobial, antifungal        | This study |
| 26 | 21.816 | (1E)-d-Glucose 2,3,4,5,6-pentakis-O-(trimethylsilyl)-o-methyloxyme | 0.27 | 569 | C <sub>22</sub> H <sub>55</sub> NO <sub>6</sub> Si <sub>5</sub> | No reported antimicrobial        | [68-69]    |
| 27 | 22.293 | Pentadecanoic acid, TMS derivative                                 | 0.68 | 314 | C <sub>18</sub> H <sub>38</sub> O <sub>2</sub> Si               | Antimicrobial                    | This study |
| 28 | 22.349 | Glucose, 5TMS derivative                                           | 0.56 | 540 | C <sub>21</sub> H <sub>52</sub> O <sub>6</sub> Si <sub>5</sub>  | No reported antimicrobial        | [69]       |
| 29 | 25.113 | Dimethyl(octadecyloxy) propyl silane                               | 0.32 | 370 | C <sub>23</sub> H <sub>50</sub> OSi                             | No reported antimicrobial        | This study |
| 30 | 29.18  | 1-Monopalmitin, 2TMS derivative                                    | 0.07 | 474 | C <sub>25</sub> H <sub>54</sub> O <sub>4</sub> Si <sub>2</sub>  | No reported antimicrobial        | This study |
| 31 | 29.232 | 5-Methyl-heneicosane                                               | 0.09 | 310 | C <sub>22</sub> H <sub>46</sub>                                 | No reported antimicrobial        | This study |
| 32 | 30.399 | 1,2,3,5-Tetrakis-O-(trimethylsilyl)-β-D-arabinofuranose            | 0.28 | 438 | C <sub>17</sub> H <sub>42</sub> O <sub>5</sub> Si <sub>4</sub>  | Antimicrobial, anti-inflammatory | This study |
| 33 | 31.661 | Tetracontane                                                       | 0.33 | 562 | C <sub>40</sub> H <sub>82</sub>                                 | Antimicrobial, antioxidant       | [74]       |

**Table S1.** Bioactive compounds identified by GC-MS of *Streptomyces* spp. ethyl acetate extract.
